# Supplementary material
Source: publisher figshare collection journal article supplement (https://springernature.figshare.com/ndownloader/files/7057355)

**Additional File 4. Figure S4. The network representing the rules of co-mutation sites in B viruses (Yamagata lineage).**

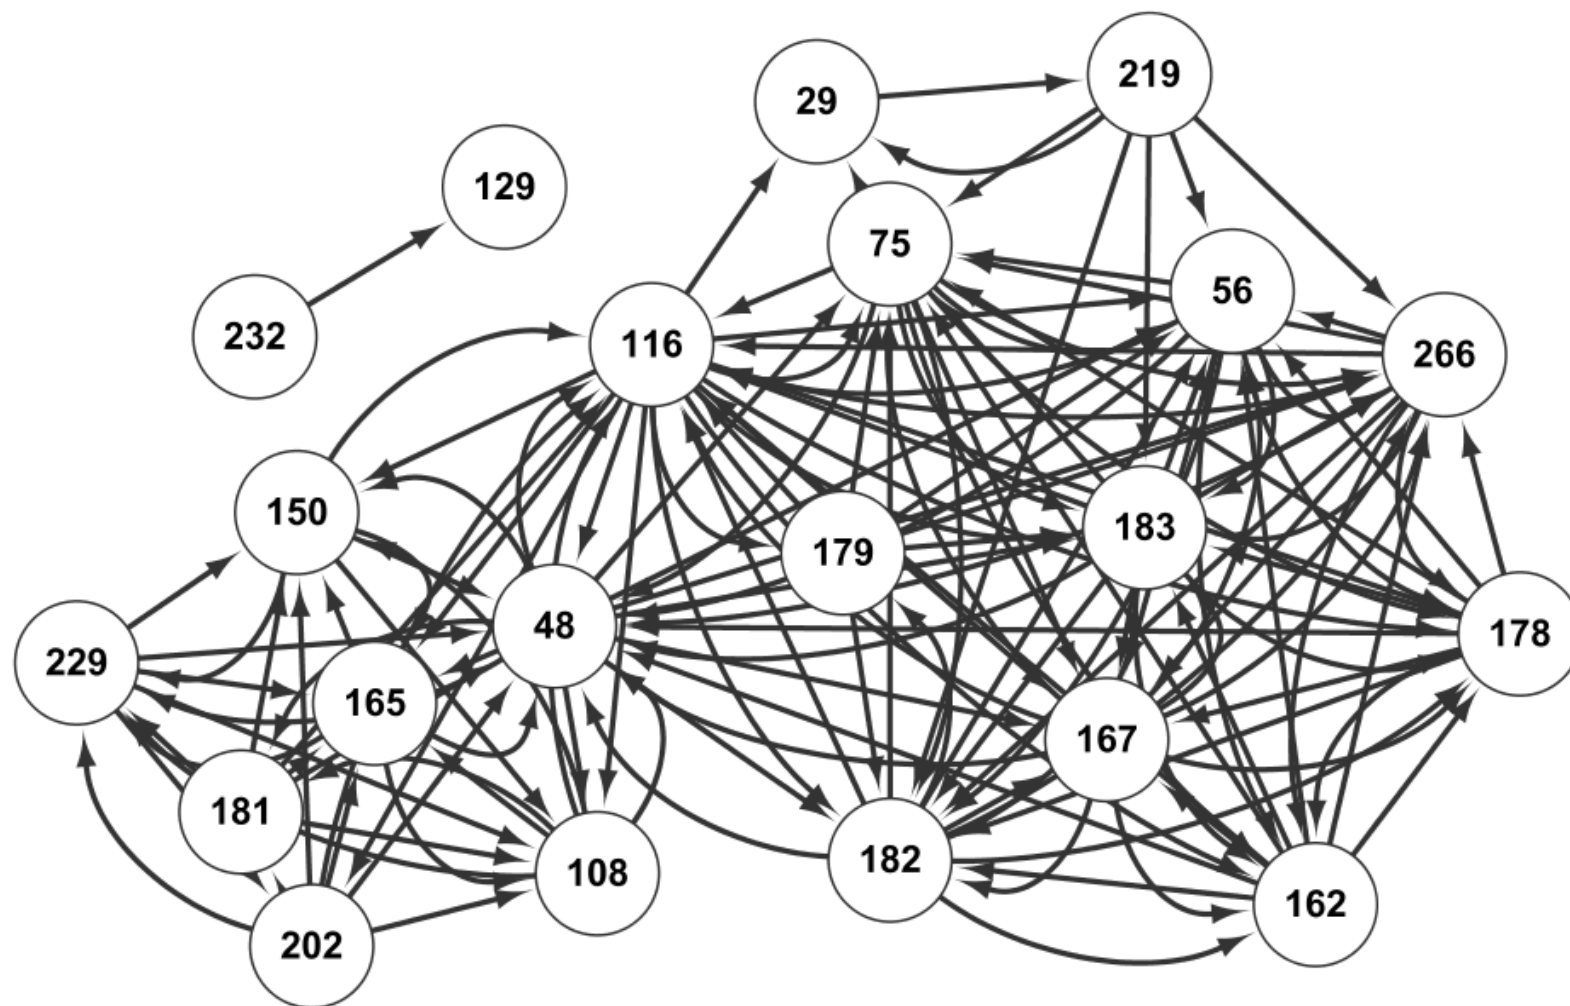

Supplement: Supplementary file [file 7057355]
